# Supplementary material for: The El Niño event of 2015–16: Climate anomalies and their impact on groundwater resources in East and Southern Africa
Source: Copernicus journal article supplement (doi:10.5194/hess-2018-516), 2018-10-08
Supplement: Supplementary file 1 [file hess-2018-516-supplement.pdf]

1 **The El Niño event of 2015-16: Climate anomalies and their impact on groundwater**  
2 **resources in East and Southern Africa**

3

4 S.R. Kolusu<sup>1</sup>, M. Shamsudduha<sup>2,3</sup>, M.C. Todd<sup>1</sup>, R.G. Taylor<sup>3</sup>, D. Seddon<sup>3</sup>, J. J. Kashaigili<sup>4</sup>,  
5 G.Y. Ebrahim<sup>5</sup>, M. Cuthbert<sup>3,6</sup>, J.P.R. Sorensen<sup>7</sup>, K.G. Villholth<sup>5</sup>, A.M. MacDonald<sup>8</sup>, and D.A.  
6 MacLeod<sup>9</sup>

7

8 1. Department of Geography, University of Sussex, Brighton, BN1 9QS, UK  
9 [s.kolusu@sussex.ac.uk](mailto:s.kolusu@sussex.ac.uk)

10 2. Institute for Risk and Disaster Reduction, University College London, Gower Street,  
11 London WC1E 6BT, UK

12 3. Department of Geography, UCL, Gower Street, London WC1E 6BT UK

13 4. Sokoine University of Agriculture, Morogoro, Tanzania

14 5. International Water Management Institute, Pretoria, South Africa

15 6. School of Earth and Ocean Sciences, Cardiff University, Main Building, Park Place,  
16 Cardiff, CF10 3AT, UK

17 7. British Geological Survey, Maclean Building, Crowmarsh Gifford, Wallingford,  
18 Oxfordshire OX10 8BB UK

19 8. British Geological Survey, The Lyell Centre, Research Avenue South, Edinburgh  
20 EH14 4AP UK

21 9. Oxford University, Atmospheric, Oceanic and Planetary Physics, UK

22

23

24 **Keywords**

25

26 El Nino; ENSO; Climate; groundwater; Africa; sustainability; recharge; climate impacts; water  
27 management; GRACE

28

29

## 30 **Supplementary Information**

31

### 32 S1. Climatological context: El Niño and other drivers of climate over EASE/SA, the 2015-16

#### 33 El Niño event and climate anomalies over SA

34

35 The climatological mean austral summer wet season of October-April rainfall (figure S1(a))  
36 shows a maximum extending Northwest-Southeast from Democratic Republic of Congo  
37 (DRC)/Angola in the west, across Zambia, Malawi to northern Mozambique in the East. The  
38 leading mode of interannual variability in rainfall and SPEI-7, is a north/south dipole pattern  
39 of opposing anomalies across EASE and SA, with a divide at  $\sim 11^{\circ}\text{S}$ , the approximate mean  
40 latitude of rainfall maximum and is strongly related to ENSO. This structure clearly evidenced  
41 by the leading Empirical Orthogonal Function (EOF) of SPEI-7 (figure S1(b)) which explains  
42 21.5% of total variance. The time coefficients correlate strongly with tropical SSTs (figure  
43 S1(d)) highly characteristic of the ENSO SST anomalies in both the Pacific and Indian Oceans,  
44 notably the SW/NE positive/negative correlation dipole across the southwest/equatorial Indian  
45 Ocean (e.g. Lindesay, 1988; Reason *et al.*, 2000, Lazenby *et al.*, 2016). As such, for Africa  
46 South of the equator the leading mode of climate variability is strongly related to ENSO, with  
47 wet (dry) anomalies during El Niño (la Niña) events across EASE (SA). The EOF pattern is  
48 largely insensitive to the length of choice of months in the wet season. This north-south dipole  
49 response across EASE/SA to ENSO has been well documented previously (Ropelewski and  
50 Halpert, 1987; Janowiak, 1988; Goddard and Graham, 1999; Manatsa *et al.*, 2011), although  
51 the physical mechanisms of teleconnection remain elusive (see Blamey *et al.* 2018 for a  
52 summary).

53

54 The climate anomaly pattern during 2015-16 was highly characteristic of this mode (compare  
55 figures 1(a) and S1b). Very strong SST anomalies over the Pacific and elsewhere in the tropics  
56 during 2015-16 (figure S1(d)) were associated with a strong north/south dipole in rainfall with  
57 drought in SA (figure 1(a)). The socio-economic impacts were pronounced, with much of SA  
58 affected by drought, leading to a regional drought disaster declaration by the Southern Africa  
59 Development Community (SADC). By September 2016, six SADC countries had declared  
60 'national drought emergencies' (Botswana, Namibia Lesotho, Malawi, Swaziland and  
61 Zimbabwe) with drought emergency declared for seven of the South Africa's nine provinces,

62 and a temporary red alert also declared for central and Southern provinces of Mozambique  
63 (SADC 2016a). The drought resulted in an extensive loss of crops and livestock, an increase in  
64 food prices, driving an estimated 39 million people into deeper food insecurity (SADC 2016a;  
65 2016b; Archer *et al.*, 2017). Surface water shortages further affected electricity generation and  
66 domestic supply, affecting economic activity and human health (SADC, 2016a; Siderius *et al.*  
67 2018).

68

69 The 2015-16 El Niño was without doubt one of the strongest on record, and by some  
70 indicators was actually the strongest. There are many measures of ENSO strength (see  
71 e.g. <https://www.esrl.noaa.gov/psd/enso/dashboard.html>), which provide a mixed picture on  
72 the relative strength of the major events. 2015-16 appears strongest based on the Niño 3.4,  
73 Niño 4 and Bivariate El Niño – Southern Oscillation index, whilst 1997-98 is the strongest  
74 based on the (East pacific Niño 3 and 1+2 SST indices, east Pacific heat content and the  
75 Multivariate El Niño index. However, 2015-16 was certainly more persistent than 1997-98  
76 with many indices turning positive at some time in 2014 related to the El Niño event that was  
77 predicted in 2014 but did not develop fully until 2015-16 (Levine and McPhaden, 2016).

78

79 However, there is substantial diversity in the character of El Niño events, in terms of both (i)  
80 the structure and magnitude of anomalies in the Pacific sector. For example, 2015-16 and 1997-  
81 98 differed in that the former was stronger in the Central Pacific sector (Niño3.4 and Niño SST  
82 region) and the latter in the East Pacific (Niño 1+2 and Niño 3 SST regions) (ii) the state and  
83 evolution of other regional drivers of climate variability which interact with ENSO  
84 teleconnection processes, such that the remote impacts over Africa can be quite variable (e.g.  
85 Ratnam *et al.*, 2014; Preethi *et al.*, 2015; Hoell *et al.*, 2017; Blamey *et al.*, 2018). Across  
86 Southern Africa (SA) multiple regional structures of ocean and atmospheric variability  
87 modulate the impacts of ENSO including the South Indian Ocean dipole (Reason, 2001) as  
88 well as the Angola low and Botswana High atmospheric features (Blamey *et al.*, 2018).  
89 Furthermore, intraseasonal variability associated with the Madden Julian Oscillation, with 30-  
90 60 day timescales can also modulate interannual drivers of variability, particularly over East  
91 Africa (Berhane and Zaitchik, 2014).

92

93 Over East Africa rainfall is more strongly related to the state of the Indian Ocean than to ENSO.  
94 The Indian Ocean Zonal mode (IOZM), an east-west pattern of atmosphere-ocean variability  
95 across the Equatorial Indian ocean, strongly modulates the regional Walker circulation and  
96 hence rainfall over East Africa. During positive IOZM events warmer ocean temperatures in  
97 the equatorial west Indian Ocean and cooler temperatures in the east lead to enhanced rainfall  
98 over EASE, with negative IOZM leading to a reduction in rainfall (see Nicholson 2017 for a  
99 review and references therein). The impact of ENSO on EASE is therefore intimately  
100 connected to the state of the IOZM (Black *et al.*, 2003, Manatsa *et al.*, 2011). During 2015-16  
101 the IOZM was only weakly positive (see SST anomalies in figure S1(d)) and the seasonal de-  
102 trended IOZM index (Saji *et al.*, 1999) in 2015-16 was ranked 16<sup>th</sup> out of 150 years. As a result,  
103 the mean equatorial zonal Indian Ocean Walker cell with ascent (descent) in the east at ~100°E  
104 (west at ~50°E) of the basin is only weakly perturbed. The zonal cross section over the East  
105 Africa-Indian Ocean sector indicates that enhanced large-scale uplift is limited to a quite  
106 restricted region of EASE from ~33°-40°E. In this way, the weak reorganisation of the Indian  
107 ocean Walker circulation led to rather moderate rainfall anomalies over EASA (Section 3.1).

108

## 109 S2. The Standardised Precipitation-Evapotranspiration Index (SPEI) and other data used

110

111 We derive the 7-month SPEI October-April (Vincente-Serrano *et al.*, 2010) over the period  
112 1901 to present, using precipitation data from the Global Precipitation Climatology Centre  
113 (GPCC) monthly product v7 (Schneider *et al.*, 2011a; Schneider *et al.*, 2013) at 1.0° resolution,  
114 extended beyond 2013 by combining with the GPCC V4 monitoring product (Schneider *et al.*  
115 2011b). To account for uncertainty in estimation of PET we use three parameterisations of  
116 varying complexity: The Penman-Montieth equation, based on net radiation, temperature,  
117 wind-speed and vapour pressure); The Hargreaves equation, based on mean, minimum and  
118 maximum temperature and extra-terrestrial solar radiation; The Thornthwaite equation, which  
119 is based solely on surface air temperature. The variables required for the various PET estimates  
120 are obtained from the CRUTS3.24.01 dataset (Harris *et al.*, 2014).

121

122 There is evidence to indicate recharge is preferentially driven by intense rainfall (see references  
123 in Sections 1 and 3.1.1). To examine the impact of El Niño on rainfall intensities within the  
124 Oct-April 2015-16 season we use derive percentiles of the daily rainfall probability distribution

125 from the TRMM3B42 product. In the absence of robust knowledge of actual rainfall thresholds  
126 associated with groundwater recharge, and the likelihood that such thresholds are highly  
127 variable in space and time, we use the 80<sup>th</sup> percentile of daily rainfall within the season as a  
128 coarse proxy for rainfall events likely to be associated with recharge. Our results (Section 3.1.1  
129 are largely insensitive to the choice of percentile value (not shown). Information on the large-  
130 scale atmospheric circulation is diagnosed from the horizontal and vertical winds, and specific  
131 humidity from ERA-Interim reanalysis data (Dee *et al.*, 2011). SST data are obtained from the  
132 extended reconstructed sea surface temperature (ERSST) version 4 from the National  
133 Oceanographic and Atmospheric Administration (NOAA) (Smith *et al* 2008) on a 2° grid.

134

### 135 S3. SPEI-7 Intensity-Area-Frequency (IAF) curves and associated return period estimates, and 136 attribution of anthropogenic influence

137

138 Droughts are spatially extensive but variable features. We represent the spatial extent using  
139 IAF curves which show the intensity of SPEI-7 water balance anomalies across all spatial scales  
140 within a study domain. IAF curves are independent of the precise spatial patterns of SPEI-7  
141 anomalies, and as such allow us to compare droughts between individual years, and to calculate  
142 the return periods for drought events across scales. This direct comparability of SPEI-7 IAF  
143 curves is valuable since no two drought events have exactly the same spatial pattern. The IAF  
144 curves are derived using the method of Mishra and Cherkauer (2010) separately over the two  
145 study domains of EASE and SA, by calculating the mean SPEI-7 value of grid cells lying within  
146 various areal extent intervals: The areas covered by the lowest (for SA) or highest (for EASE)  
147 5th, 10th, 20th...100th areal percentiles of SPEI grid cell values within the domain area i.e.  
148 when all grid cells are ranked. This allows, for each season, the mean SPEI-7 IAF curve to be  
149 plotted (see figure 3).

150

151 We then estimate the return period of the 2015-16 El Niño event by comparing the observed  
152 SPEI-7 IAF curve of 2015-16 with IAF curves representing various ‘benchmark’ return  
153 periods (figure 3) and finding the closest match, by least squared error. Estimating these  
154 benchmark return periods of drought events is challenging given the relatively short  
155 observational record for what are relatively long duration events, and indeed because of non-  
156 stationarity in climate records under a changing climate. We address both these challenges in

157 our approach. To counter the problem of insufficient sampling of the extreme tail of the  
158 distribution, we increase our sample of climate events beyond the observed record using large  
159 ensembles of climate model simulations from the HAPPI experiment (Mitchell *et al.*, 2017).  
160 HAPPI is designed specifically to quantify climate extremes, through the use of relatively  
161 high model resolution and large initial-condition ensembles. We use precipitation data from  
162 four atmospheric models, namely HadGEM3, CAM5, MIROC5 and NorESM, (degraded to  
163 common resolution of 1°) each with 10 ensemble members, run over the period ~1950s-  
164 2010s, forced with observed SSTs and ‘historical’ greenhouse gases and aerosol radiative  
165 forcings. These simulations provide about 2400 years of simulated data, with greater  
166 statistical definition of the extreme tail of the distribution required for the extreme events,  
167 notably the 2015-16 drought over SA which is the strongest on record. As with the  
168 observations we derive the mean SPEI-7 for each areal extent interval (5th, 10th, etc. spatial  
169 percentiles over the domain), for each of the ~2400 model years. Estimation of return periods  
170 is based on the Extreme Value Theory (EVT), widely used for the description of rare climate  
171 events in the extreme tail of the parameter distribution. The Generalized Extreme Value  
172 distribution (GEV) is fitted to the distribution of only the extreme SPEI-7 values, for each  
173 areal extent separately (using maximum likelihood estimation and a chi-squared goodness-of-  
174 fit test, Coles *et al.*, 2001). This distribution of extremes (‘block maxima’) is composed of the  
175 most intense SPEI-7 values (for drought over the SA domain SPEI-7 is multiplied by -1)  
176 within non-overlapping ‘blocks’ of 30 years, a standard climatological period. Then, return  
177 periods are estimated by inverting the resulting GEV cumulative probability distribution for a  
178 range of periods from 30-300 years, for each areal extent separately, providing IAF curves for  
179 benchmark return periods (see figure 3). Whilst our approach is similar to previous drought  
180 analyses (e.g. Robeson, 2015) we recognise a number of caveats. First, the estimated return  
181 periods are sensitive to the arbitrary choice of block size and we estimate the uncertainty  
182 associated with this using periods of 25-60 years. Second, whilst the large ensembles  
183 provided by the HAPPI experiment are designed specifically for analysis of extremes they  
184 necessarily provide only a partial representation of the climate variability ‘space’.

185

186 For estimation of return periods shorter than the duration of one ‘block’ (30 years), we  
187 follow Mishra and Cherkauer (2010) and Philip *et al.* (2018) in fitting a distribution to the  
188 historical record of SPEI-7 data. For each areal extent interval (5<sup>th</sup>, 10<sup>th</sup>, etc. spatial

189 percentiles) we fit a GEV distribution to the 116 historical SPEI-7 data points. We then invert  
190 the cumulative distribution to derive return periods for every spatial percentile, giving a set of  
191 IAF benchmark return period curves. Finally, we conduct all the above IAF curve return  
192 period analysis using SPEI-7 derived with each of the three PET equations and provide the  
193 average return period estimates and the associated range to represent this component of  
194 uncertainty.

195

196 It is likely that anthropogenic climate change is, and will continue to, affect large-scale  
197 hydrology. As such, climate risks are changing and non-stationarity in climate records  
198 complicates the interpretation of return periods. However, the IPCC recent assessment report  
199 concludes that there is only low confidence in detection and attribution of observed changes in  
200 drought extremes globally (Bindoff *et al.*, 2013), largely due to uncertainties in distinguishing  
201 relatively small trends in precipitation from decadal variability, especially given limitations in  
202 precipitation data. Nevertheless, attribution of recent temperature rises is robust even down to  
203 the regional/continental scale (Bindoff *et al.*, 2013). In recent probabilistic event attribution  
204 analyses of tropical drought events the contribution of anthropogenic temperature effects is  
205 discernible, in contrast to that of precipitation (Marthews *et al.*, 2015). As such, the full causal  
206 chain from climate anomaly through water balance to agricultural drought is complex and  
207 typically not well represented in models such that attribution of drought remains extremely  
208 challenging. Therefore, here we estimate the effects purely of anthropogenic temperature trends  
209 on drought risk over SA through a simplified attribution experiment. The SPEI-7 IAF return  
210 period analysis above is repeated, but in deriving the benchmark return period curves the  
211 temperature data, used in calculating PET, has the signal of anthropogenic climate change  
212 removed. Specifically, PET is estimated using the HAPPI multi-ensemble mean temperature  
213 from a counterfactual world without human influence on radiative forcing: the ‘natural’ runs,  
214 in which only the natural forcings (solar variability and volcanic aerosols) are provided to the  
215 models. To ensure space-time consistency in all the climate variables whilst changing the  
216 temperature data, we used the 30-year smoothed temperature from the ‘natural’ model runs to  
217 which is added the anomalies of temperature from the ‘historical’ run with respect to a 30-year  
218 running mean. Not that we derive the SPEI-7 over both datasets merged together so that the  
219 effect of the temperature perturbation between the ‘natural’ and ‘historical’ runs is reflected in  
220 the resulting SPEI-7 values, given that the index is standardised across the timeseries. The

221 benchmark return period IAF curves are then derived from the SPEI-7 values for each dataset  
222 separately. Thus, comparing the estimated SPEI-7 IAF return periods from the climate with  
223 ‘historical’ temperature with those from a counterfactual climate with the ‘natural’ only  
224 temperature, provides an indication of the influence of the anthropogenic temperature trend  
225 effects on drought risk over SA. We note that the SPEI is quite temperature dependent through  
226 PET calculation such that other drought indices may yield different sensitivity to warming.

227  
228 We must emphasise that this analysis deliberately considers only the effects of the slowly  
229 evolving anthropogenic influence on temperature. We do not consider anthropogenic  
230 influences on rainfall and the other determinants of PET i.e. wind speed, humidity, radiation  
231 budget, no any changes to variability in temperature. As such, in utilising a large model  
232 ensemble to define the statistics of extreme events, we retain some features of the probabilistic  
233 event attribution method (e.g. Allen et al., 2003, Stott et al., 2014) but focus solely on that  
234 aspect of climate change (near surface temperatures) for which we have greatest confidence in  
235 the ability of models to represent with credibility.

236

#### 237 S4 Groundwater storage estimates from GRACE and LSMs

238

239 To address uncertainty associated with different GRACE processing strategies to resolve  
240  $\Delta$ TWS (Eq. 1) we apply an ensemble mean of three GRACE TWS. Namely, the CSR land  
241 (version RL05.DSTvSCS1409, Swenson and Wahr, 2006; Landerer and Swenson ,2012) and  
242 JPL Global Mascon (version RL05M\_1.MSCNv01, Watkins *et al.*, 2015; Wiese *et al.*, 2015)  
243 solutions, from NASA’s *GRCTellus* data dissemination site (<http://grace.jpl.nasa.gov/data>),  
244 and a third GRGS GRACE solution (CNES/GRGS release RL03-v1) (Biancale *et al.*, 2006)  
245 from the French Government space agency, Centre National D’études Spatiales (CNES).

246

247 *GRCTellus* CSR land solution (version RL05.DSTvSCS1409) is post-processed from spherical  
248 harmonics released by the Centre for Space Research (CSR) at the University of Texas at  
249 Austin. *GRCTellus* gridded datasets are available at a monthly time step and a spatial resolution  
250 of  $1^\circ \times 1^\circ$  (~111 km at equator) though the actual spatial resolution of GRACE footprint is  
251 ~450 km or ~200,000 km<sup>2</sup> (Scanlon *et al.*, 2012). To amplify TWS signals we apply the  
252 dimensionless scaling factors provided as  $1^\circ \times 1^\circ$  bins that are derived from minimising



253 differences between TWS estimated from GRACE and the hydrological fields from the  
254 Community Land Model (CLM4.0) (Landerer and Swenson, 2012). JPL-Mascons (version  
255 RL05M\_1.MSCNv01) data processing involves the same glacial isostatic adjustment  
256 correction but applies no spatial filtering as JPL-RL05M directly relates inter-satellite range-  
257 rate data to mass concentration blocks (mascons) to estimate monthly gravity fields in terms of  
258 equal area  $3^\circ \times 3^\circ$  mass concentration functions in order to minimise measurement errors.  
259 Gridded mascon fields are provided at a spatial sampling of  $0.5^\circ$  in both latitude and longitude  
260 ( $\sim 56$  km at the equator). Similar to *GRCTellus* CSR product, dimensionless scaling factors are  
261 provided as  $0.5^\circ \times 0.5^\circ$  bins (Shamsudduha *et al.*, 2017) that also derive from the Community  
262 Land Model (CLM4.0) (Wiese *et al.*, 2016). The scaling factors are multiplicative coefficients  
263 that minimize the difference between the smoothed and unfiltered monthly  $\Delta$ TWS variations  
264 from the CLM4.0 hydrology model (Wiese *et al.*, 2016). GRGS monthly GRACE products  
265 (version RL03-v1) are processed and made publicly available (<http://grgs.obs-mip.fr/grace>) by  
266 CNES (Shamsudduha *et al.*, 2017). Further details on the Earth's mean gravity-field models  
267 can be found on the CNES official website of GRGS/LAGEOS (<http://grgs.obs-mip.fr/grace/>).

268

269 GRACE  $\Delta$ TWS time-series data have some missing records as the satellites are switched off  
270 for conserving battery life (Shamsudduha *et al.*, 2017); these missing records are linearly  
271 interpolated (Shamsudduha *et al.*, 2012). Monthly  $\Delta$ TWS time-series data as equivalent water  
272 depth (cm) are extracted from GRACE TWS datasets by creating a 200 km radial buffer (i.e.  
273 area equivalent of  $\sim 120\,000$  km<sup>2</sup>) around at two groundwater-level monitoring sites  
274 (Makutapora and Limpopo) and by the point of interest and taking the mean values aggregating  
275 the selected grid points.

276

277 To derive  $\Delta$ GWS from GRACE  $\Delta$ TWS (eq. 1), we use simulated soil moisture to represent  
278  $\Delta$ SMS and surface runoff, as a proxy for  $\Delta$ SWS (Mishra *et al.*, 2016), from LSMs within  
279 NASA's Global Land Data Assimilation System (GLDAS). GLDAS is an uncoupled land  
280 surface modelling system that includes multiple global LSMs driven by surface meteorology  
281 from the NCEP data assimilation system, CMAP disaggregated precipitation and the Air Force  
282 Weather Agency satellite-derived radiation fields (Rodell *et al.*, 2004). We apply monthly  
283  $\Delta$ SMS and surface runoff data at a spatial resolution of  $1^\circ \times 1^\circ$  from 4 GLDAS LSMs: The  
284 Community Land Model (CLM, version 2) (Dai *et al.*, 2003), NOAH (version 2.7.1) (Ek *et al.*,

285 2003), the Variable Infiltration Capacity (VIC) model (version 1.0) (Liang *et al.*, 2003), and  
286 MOSAIC Mosaic (version 1.0) (Koster and Suarez, 1992). The respective total depths of  
287 modelled soil profiles are 3.4 m, 2.0 m, and 1.9 m and 3.5 m in CLM (10 vertical layers),  
288 NOAH (4 vertical layers), and VIC (3 vertical layers), and Mosaic (3 vertical layers) (Rodell  
289 *et al.*, 2004). In the absence of in situ  $\Delta$ SMS and  $\Delta$ SWS data in the study areas, we apply an  
290 ensemble mean of the 4 LSMs-derived  $\Delta$ SMS and  $\Delta$ SWS data in order to disaggregate GRACE  
291  $\Delta$ TWS signals across our study regions, for the period August 2002 to July 2016, similar to the  
292 approach applied for other locations by Shamsudduha *et al.* (2012; 2017). To help  
293 interpretation of these mean  $\Delta$ GWS signals we also present the total uncertainty in estimates  
294 of  $\Delta$ GWS which result from the uncertainty in estimates of  $\Delta$ TWS,  $\Delta$ SMS and  $\Delta$ SWS (blue  
295 shading in figure 5(c)). The uncertainty in these individual water balance components is shown  
296 in figure S2 i.e. the range in estimated GRACE  $\Delta$ TWS across the three retrieval estimates, and  
297 the ranges in estimates  $\Delta$ SMS and  $\Delta$ SWS across the four LSMs. Overall, the total uncertainty  
298 in  $\Delta$ GWS can be substantial and receives roughly equal contribution from uncertainty in  $\Delta$ TWS  
299 and  $\Delta$ SMS with uncertainty in  $\Delta$ SWS important only occasionally. There is some indication  
300 that during the periods of greatest  $\Delta$ GWS uncertainty, the  $\Delta$ TWS uncertainty is most important  
301 e.g. 2009-10 and 2015-16 at Limpopo. For further understanding of the uncertainty in the  
302 estimates water storage from LSMs with respect to GRACE readers are referred to Scanlon *et*  
303 *al.* (2018).

304

### 305 S5. Groundwater storage estimates from piezometric observations

306

307 Groundwater-level time series records were compiled in two areas situated at the heart of the  
308 two EASE/SA ENSO rainfall dipole centres of action (figure 1(a)). (i) The Makutapora  
309 wellfield (35.75°E, 5.90°S) site in central Tanzania, East Africa. Groundwater records were  
310 collated from the Ministry of Water and Irrigation and the Dodoma Urban Water Supply,  
311 Tanzania. Here, groundwater is abstracted from an aquifer comprising deeply weathered  
312 granite overlain by alluvium (Taylor *et al.*, 2013). Data from three sites in the wellfield met the  
313 data quality criteria and are averaged together; mean groundwater-level time series records  
314 were converted to monthly anomalies in GWS using an in-situ derived  $S_y$  value of 0.06 (Taylor  
315 *et al.*, 2013). We estimate that these data are representative of groundwater levels across an  
316 area of  $\sim 60$  km<sup>2</sup> (Taylor *et al.*, 2013). (ii) Limpopo Basin in Southern Africa ( $\sim 28$  to  $32^\circ$ E,

317 22.5 to 25°S). Groundwater-level records from 40 stations within weathered hard-rock  
318 (“basement”) aquifers in sub-basins A6 (Mogalakwena), A7 (Sand), A8 (Nzhelele) and A9  
319 (Luvuvhu) of the Limpopo Basin were collated from the Department of Water and Sanitation,  
320 Directorate Surface and Groundwater Information, South Africa. The data were first  
321 standardised then averaged together and represent an area estimated to be ~ 47 000 km<sup>2</sup>. For  
322 both sites daily to monthly groundwater-level records within our common study period of  
323 August 2002 to July 2016, were checked for consistency (missing data less than 10%) and  
324 selected for groundwater storage analysis. Mean groundwater-level time series records were  
325 converted to monthly anomalies in GWS using a  $S_y$  value that produced the lowest root-mean  
326 square error between in situ and GRACE GWS; the applied value (0.025) is consistent with  
327 that estimated for basement aquifers in Africa by MacDonald *et al.* (2012).

328

329 We acknowledge that our estimates of GWS from piezometry may be influenced by  
330 abstractions and we provide data on pumping rates from Makutapora (figure 5(c)). A  
331 numerical method to remove the effects of pumping is currently the subject of ongoing  
332 research by the authors, so in this case we infer the effect of pumping on GWS only in only  
333 relative qualitative terms. Equivalent direct data on direct pumping rates is not available at  
334 Limpopo. However, we note that Cai *et al.* (2017) mapped the spatial extent of irrigation  
335 across the Limpopo basin in South African using satellite data and estimated that irrigation  
336 from groundwater provides about 50% of the irrigated areas over 2% of the land area, which  
337 likely influences groundwater storage locally.

338

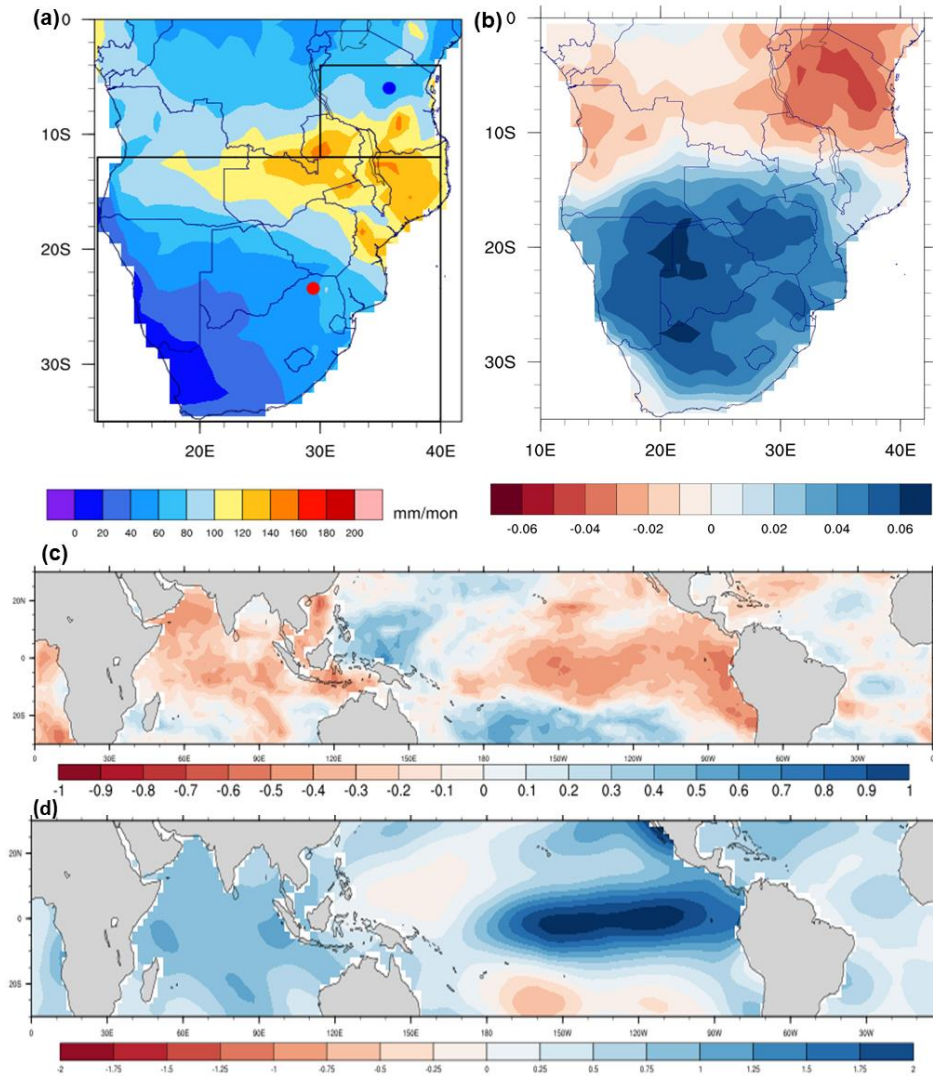

339  
 340 Figure S1. (a) Climatological precipitation for the October-April season for the period of 1901-  
 341 2016 ( $\text{mm month}^{-1}$ ). Boxes in figure S1(a) show the EASE (small box) and SA (big box)  
 342 domains used in the IAF analysis (see Section 2.1). The blue and red filled circles denote the  
 343 piezometer observation locations at Makutapora, Tanzania and Limpopo, South Africa,  
 344 respectively. (b) Leading mode of interannual October-April variability calculated using the  
 345 empirical orthogonal function (EOF) analysis of de-trended rainfall of GPCCC. (c) Correlation  
 346 between coefficients of EOF1 (figure S1(b)) and global SST (October-April mean) 1901-2016.  
 347 (d) SST anomalies (K) October-April 2015-16  
 348

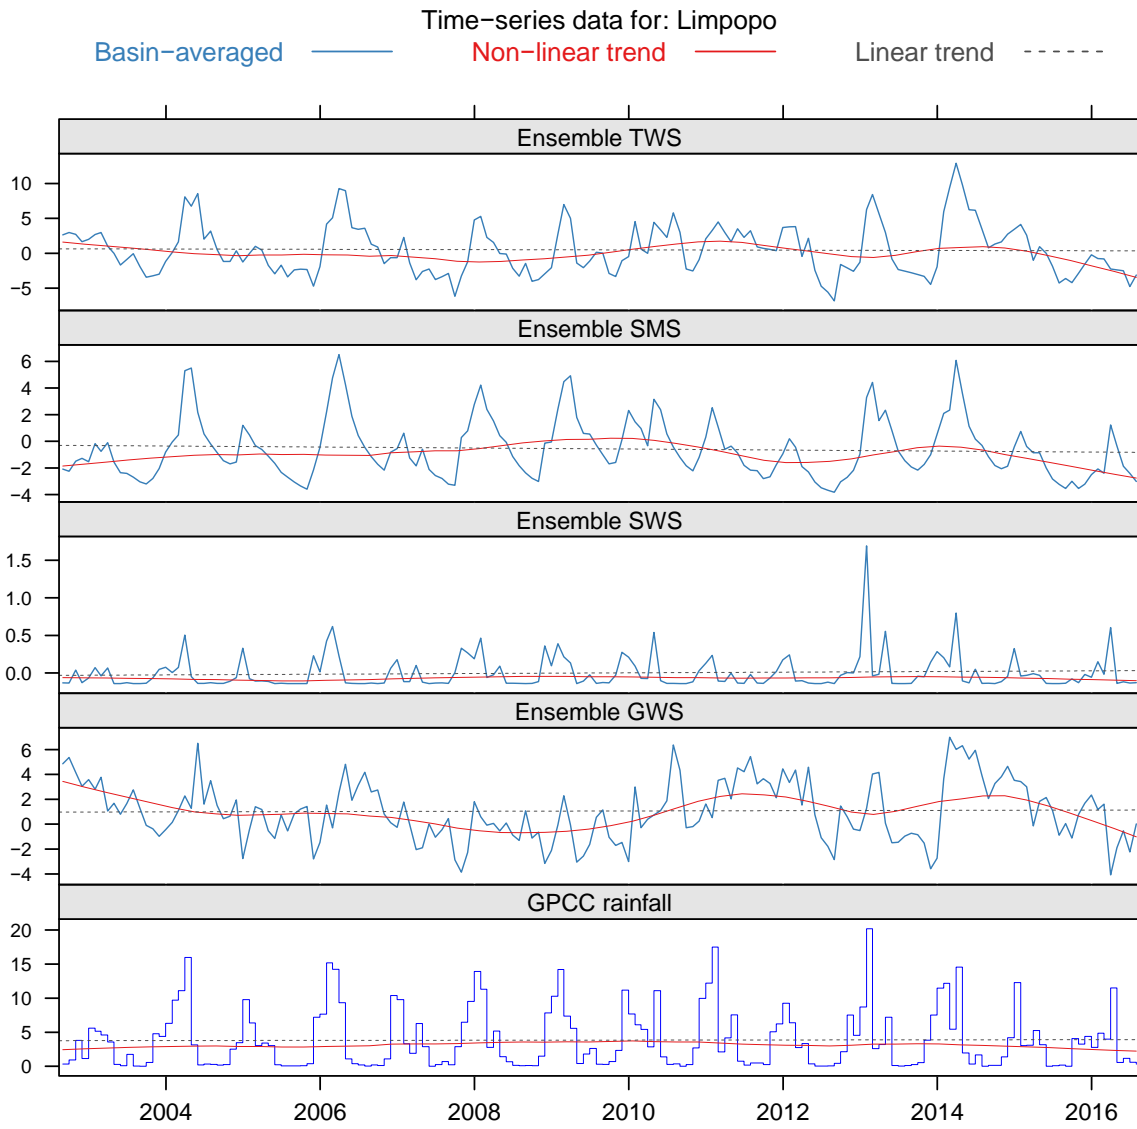

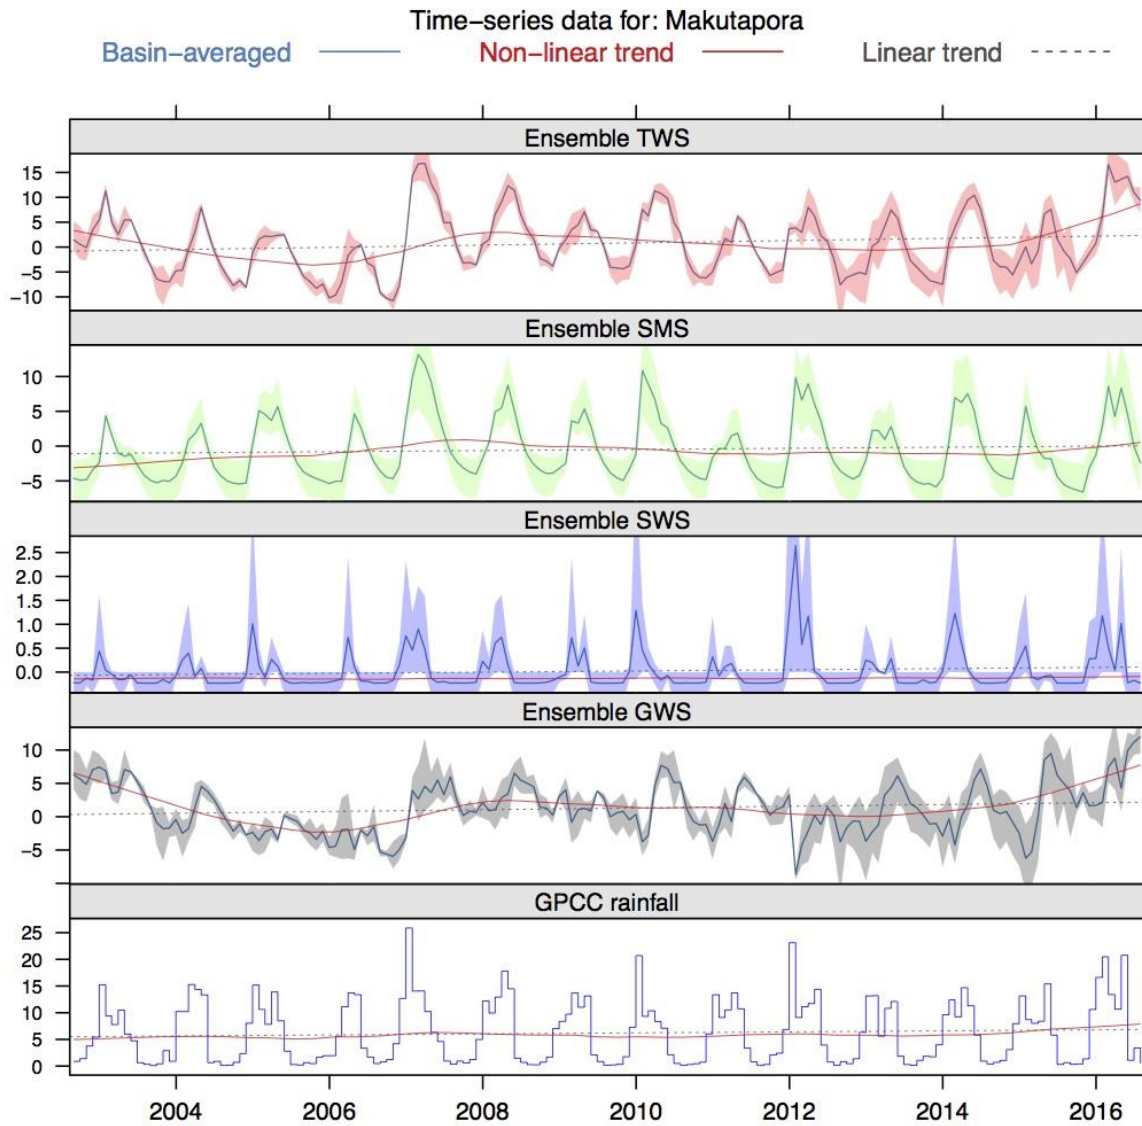

350

351 Figure S2: Time series of monthly estimates of anomalies in the individual components of  
 352 water balance (lines) and the associated uncertainty range (shaded). From top to bottom TWS  
 353 from GRACE; SMS and SWS both from LSMs; the residual GWS; observed GPCP rainfall,  
 354 (all in cm) at (a) Limpopo (b) Makutapora.

355

356 References.

357 Allen, M. : Liability for climate change, *Nature*, 421(6926), 891,2003.

358

359 Archer, E. R. M., Landman, W. A., Tadross, M. A., Malherbe, J., Weepener, H., Maluleke,  
360 P., & Marumbwa, F. M.: Understanding the evolution of the 2014–2016 summer rainfall  
361 seasons in southern Africa: Key lessons, *Climate Risk Management*, 16, 22-28, 2017.

362

363 Bindoff, N.L., P.A. Stott, K.M. AchutaRao, M.R. Allen, N. Gillett, D. Gutzler, K. Hansingo,  
364 G. Hegerl, Y. Hu, S. Jain, I.I. Mokhov, J. Overland, J. Perlwitz, R. Sebbari and X. Zhang,:  
365 Detection and Attribution of Climate Change: from Global to Regional. In: Climate Change  
366 2013: The Physical Science Basis. Contribution of Working Group I to the Fifth Assessment  
367 Report of the Intergovernmental Panel on Climate Change [Stocker, T.F., D. Qin, G.-K.  
368 Plattner, M. Tignor, S.K. Allen, J. Boschung, A. Nauels, Y. Xia, V. Bex and P.M. Midgley  
369 (eds.)]. Cambridge University Press, Cambridge, United Kingdom and New York, NY,  
370 USA,2013.

371

372 Berhane, F., & Zaitchik, B: Modulation of daily precipitation over East Africa by the  
373 Madden–Julian oscillation, *Journal of Climate*, 27(15), 6016-6034, 2014.

374

375

376 Biancale, R., Lemoine, J-M., Balmino, G., Loyer, S., Bruisma, S., Perosanz, .F, Marty, J-C.,  
377 and Gégout, P.: 3 Years of Geoid Variations from GRACE and LAGEOS Data at 10-day  
378 Intervals from July 2002 to March 2005, CNES/GRGS, 2006

379

380

381 Black, E., Slingo, J., & Sperber, K. R. :An observational study of the relationship between  
382 excessively strong short rains in coastal East Africa and Indian Ocean SST, *Monthly Weather*  
383 *Review*, 131(1), 74-94, 2003.

384

385 Blamey, R. C., Kolusu, S. R., Mahlalela, P., Todd, M. C., & Reason, C. J. C: The role of  
386 regional circulation features in regulating El Niño climate impacts over southern Africa: A

387 comparison of the 2015/2016 drought with previous events, *International Journal of*  
388 *Climatology*, <https://doi.org/10.1002/joc.5668>, 2018.

389

390 Cai, X., Magidi, J., Nhamo, L., & van Koppen, B.: *Mapping irrigated areas in the Limpopo*  
391 *Province, South Africa*(Vol. 172),International Water Management Institute (IWMI Working  
392 Paper 172), doi: 10.5337/2017.205 , 2017.

393

394 Coles, S., Bawa, J., Trenner, L., & Dorazio, P.:*An introduction to statistical modelling of*  
395 *extreme values* (Vol. 208), London: Springer, 2001.

396

397 Dai, Y., Zeng, X., Dickinson, R. E., Baker, I., Bonan, G. B., Bosilovich, M. G., ... & Oleson,  
398 K. W. :The common land model, *Bulletin of the American Meteorological Society*, 84(8),  
399 1013-1024, 2003.

400

401 Dee, D. P., Uppala, S. M., Simmons, A. J., Berrisford, P., Poli, P., Kobayashi, S., ... &  
402 Bechtold, P.: The ERA-Interim reanalysis: Configuration and performance of the data  
403 assimilation system, *Quarterly Journal of the royal meteorological society*, 137(656), 553-  
404 597, 2011.

405

406 Ek, M. B., Mitchell, K. E., Lin, Y., Rogers, E., Grunmann, P., Koren, V., ... & Tarpley, J. D.  
407 :Implementation of Noah land surface model advances in the National Centers for  
408 Environmental Prediction operational mesoscale Eta model, *Journal of Geophysical*  
409 *Research: Atmospheres*, 108(D22), 2003.

410

411 Goddard, L., & Graham, N. E. :Importance of the Indian Ocean for simulating rainfall  
412 anomalies over eastern and southern Africa, *Journal of Geophysical Research:*  
413 *Atmospheres*, 104(D16), 19099-19116, 1999.

414

415 Harris, I. P. D. J., Jones, P. D., Osborn, T. J., & Lister, D. H. :Updated high-resolution grids  
416 of monthly climatic observations–the CRU TS3. 10 Dataset, *International journal of*  
417 *climatology*, 34(3), 623-642, 2014.



418

419 Hoell, A., Funk, C., Zinke, J., & Harrison, L. : Modulation of the southern Africa  
420 precipitation response to the El Niño Southern Oscillation by the subtropical Indian Ocean  
421 dipole, *Climate dynamics*, 48(7-8), 2529-2540, [https://doi.org/10.1007/s00382-016-3220-](https://doi.org/10.1007/s00382-016-3220-6)  
422 [6](https://doi.org/10.1007/s00382-016-3220-6),2017.

423

424 Janowiak, J. E. :An investigation of interannual rainfall variability in Africa. *Journal of*  
425 *Climate*, 1(3), 240-255, 1988.

426 Koster, R. D., & Suarez, M. J. : Modeling the land surface boundary in climate models as a  
427 composite of independent vegetation stands, *Journal of Geophysical Research:*  
428 *Atmospheres*, 97(D3), 2697-2715, 1992.

429

430 Landerer, F. W., & Swenson, S. C. :Accuracy of scaled GRACE terrestrial water storage  
431 estimates, *Water resources research*, 48(4), 2012.

432

433 Lazenby, M. J., Todd, M. C., & Wang, Y. : Climate model simulation of the South Indian  
434 Ocean Convergence Zone: mean state and variability, *Climate Research*, 68(1), 59-71, 2016.

435

436 Liang, X., Xie, Z., & Huang, M. :A new parameterization for surface and groundwater  
437 interactions and its impact on water budgets with the variable infiltration capacity (VIC) land  
438 surface model, *Journal of Geophysical Research: Atmospheres*, 108(D16), 2003.

439

440 Lindsay, J. A. : South African rainfall, the Southern Oscillation and a Southern Hemisphere  
441 semi-annual cycle, *Journal of Climatology*, 8(1), 17-30, 1988.

442 Levine, A. F., & McPhaden, M. J. :How the July 2014 easterly wind burst gave the 2015–  
443 2016 El Niño a head start, *Geophysical research letters*, 43(12), 6503-6510,  
444 <https://doi.org/10.1002/2016GL069204>, 2016.

445

446 MacDonald, A. M., Bonsor, H. C., Dochartaigh, B. É. Ó., & Taylor, R. G. :Quantitative maps  
447 of groundwater resources in Africa, *Environmental Research Letters*, 7(2), 024009, 2012.

448

449 Manatsa, D., Matarira, C. H., & Mukwada, G.: Relative impacts of ENSO and Indian Ocean  
450 dipole/zonal mode on east SADC rainfall, *International Journal of Climatology*, 31(4), 558-  
451 577, 2011.

452 Marthews, T. R., Otto, F. E. L., Mitchell, D., Dadson, S. J., & Jones, R. G.: The 2014 drought  
453 in the Horn of Africa: Attribution of meteorological drivers? [in “Explaining Extremes of  
454 2014 from a Climate Perspective”] *Bulletin of the American Meteorological Society*, 96(12),  
455 S83-S88, 2015.

456 Mishra, V., & Cherkauer, K. A.: Retrospective droughts in the crop growing season:  
457 Implications to corn and soybean yield in the Midwestern United States, *Agricultural and  
458 Forest Meteorology*, 150(7-8), 1030-1045, 2010.

459

460 Mitchell, D., AchutaRao, K., Allen, M., Bethke, I., Beyerle, U., Ciavarella, A., ... & Ingram,  
461 W. :Half a degree additional warming, prognosis and projected impacts (HAPPI): background  
462 and experimental design, *Geoscientific Model Development*, 10(2), 571-583,  
463 <https://doi.org/10.5194/gmd-10-571-2017>, 2017.

464

465 Nicholson, S. E.: Climate and climatic variability of rainfall over eastern Africa, *Reviews of  
466 Geophysics*, 55(3), 590-635, 2017.

467

468 Philip, S., Kew, S. F., Jan van Oldenborgh, G., Otto, F., O’Keefe, S., Haustein, K., ... &  
469 Singh, R. Attribution analysis of the Ethiopian drought of 2015, *Journal of Climate*, 31(6),  
470 2465-2486, 2018.

471

472 Preethi, B., Sabin, T. P., Adedoyin, J. A., & Ashok, K.: Impacts of the ENSO Modoki and  
473 other tropical Indo-Pacific climate-drivers on African rainfall, *Scientific reports*, 5, 16653,  
474 2015.

475

476 Ratnam, J. V., Behera, S. K., Masumoto, Y., & Yamagata, T. :Remote effects of El Niño and  
477 Modoki events on the austral summer precipitation of southern Africa, *Journal of  
478 Climate*, 27(10), 3802-3815, 2014.

479

480

481 Reason, C. J. C., Allan, R. J., Lindesay, J. A., & Ansell, T. J. : ENSO and climatic signals  
482 across the Indian Ocean basin in the global context: Part I, Interannual composite  
483 patterns. *International Journal of Climatology*, 20(11), 1285-1327,2000.  
484

485 Reason, C. J. C. : Subtropical Indian Ocean SST dipole events and southern African  
486 rainfall, *Geophysical Research Letters*, 28(11), 2225-2227,2001  
487

488 Robeson, S. M. :Revisiting the recent California drought as an extreme value, *Geophysical*  
489 *Research Letters*, 42(16), 6771-6779, 2015.  
490

491 Rodell, M., Houser, P. R., Jambor, U. E. A., Gottschalck, J., Mitchell, K., Meng, C. J., ... &  
492 Entin, J. K. ;The global land data assimilation system, *Bulletin of the American*  
493 *Meteorological Society*, 85(3), 381-394, 2004.  
494

495 Ropelewski, C. F., & Halpert, M. S. : Global and regional scale precipitation patterns  
496 associated with the El Niño/Southern Oscillation. *Monthly weather review*, 115(8), 1606-  
497 1626,1987.

498 SADC 2016a: SADC regional situation update on El Nino-induced drought, Issue 02, 12th  
499 Sepetember2016,[https://www.sadc.int/files/9514/7403/9132/SADC\\_Regional\\_Situation\\_Updated\\_No-2\\_16-09-2016.pdf](https://www.sadc.int/files/9514/7403/9132/SADC_Regional_Situation_Update_No-2_16-09-2016.pdf) accessed 30/12/17,2016.  
500  
501

502 SADC 2016b: SADC Regional Vulnerability Assessment and Analysis Synthesis Report,  
503 State of Food Insecurity and Vulnerability in the Southern African Development Community  
504 66pp,2016.  
505

506 Saji, N. H., Goswami, B. N., Vinayachandran, P. N., & Yamagata, T.: A dipole mode in the  
507 tropical Indian Ocean, *Nature*, 401(6751), 360, doi:10.1038/43854, 1999.  
508

509 Scanlon, B. R., Longuevergne, L. , and Long, D.: Ground referencing GRACE satellite  
510 estimates of groundwater storage changes in the California Central Valley, USA *Water*  
511 *Resour. Res.* 48 W04520,2012.  
512

513 Scanlon B R *et al* 2018 Global models underestimate large decadal declining and rising water  
514 storage trends relative to GRACE satellite data. *Proc. Nat. Acad.*  
515 *Sci.* <https://doi.org/10.1073/pnas.1704665115>  
516

517 Scanlon, B. R., Zhang, Z., Save, H., Sun, A. Y., Schmied, H. M., van Beek, L. P., ... &  
518 Longuevergne, L. : Global models underestimate large decadal declining and rising water  
519 storage trends relative to GRACE satellite data, *Proceedings of the National Academy of*  
520 *Sciences*, 201704665, <https://doi.org/10.1073/pnas.1704665115>,2018.  
521

522 Schneider U, Becker A, Finger P, Meyer-Christoffer A, Rudolf B, Ziese M 2011b GPCC  
523 Monitoring Product Version 4.0 at 1.0°: near real-time monthly land-surface precipitation  
524 from rain-gauges based on SYNOP and CLIMAT Data. doi: 10.5676/  
525 DWD\_GPCC/MP\_M\_V4\_100  
526

527 Schneider, U., Becker, A., Finger, P., Meyer-Christoffer, A., Ziese, M., & Rudolf, B. :  
528 GPCC's new land surface precipitation climatology based on quality-controlled in situ data  
529 and its role in quantifying the global water cycle, *Theoretical and Applied*  
530 *Climatology*, 115(1-2), 15-40, 2014.  
531

532 Shamsudduha M, Taylor R G and Longuevergne L 2012 Monitoring groundwater storage  
533 changes in the highly seasonal humid tropics: validation of GRACE measurements in the  
534 Bengal Basin *Water Resour. Res.* 48 W02508  
535

536 Shamsudduha, M., Taylor, R. G., & Longuevergne, L.: Monitoring groundwater storage  
537 changes in the highly seasonal humid tropics: Validation of GRACE measurements in the  
538 Bengal Basin, *Water Resources Research*, 48(2), 2012.  
539

540 Shamsudduha, M., Taylor, R. G., Jones, D., Longuevergne, L., Owor, M., & Tindimugaya, C.  
541 :Recent changes in terrestrial water storage in the Upper Nile Basin: an evaluation of  
542 commonly used gridded GRACE products, *Hydrology and Earth system sciences*, 21(9),  
543 4533-4549, <https://doi.org/10.5194/hess-21-4533-2017>,2017.  
544

545 Siderius, C., Gannon, K. E., Ndiyoi, M., Opere, A., Batisani, N., Olago, D., ... & Conway, D.  
546 :Hydrological response and complex impact pathways of the 2015/2016 El Niño in Eastern  
547 and Southern Africa, *Earth's Future*, 6(1), doi:10.1002/2017EF000680,2-22, 2018.  
548

549 Smith, T. M., Reynolds, R. W., Peterson, T. C., & Lawrimore, J. : Improvements to NOAA's  
550 historical merged land–ocean surface temperature analysis (1880–2006). *Journal of*  
551 *Climate*, 21(10), 2283-2296,2008.  
552

553 Stott, P. A., Hegerl, G. C., Herring, S. C., Hoerling, M .P., Peterson, T. C., Zhang, X., and  
554 Zwiers, F. W.: Introduction to explaining extreme events of 2013 from a climate perspective,  
555 *Bull. Amer. Meteor. Soc.* 95 S1–S3,2014  
556

557 Swenson, S., & Wahr, J.: Post-processing removal of correlated errors in GRACE  
558 data, *Geophysical Research Letters*, 33(8),2006.  
559

560 Taylor, R. G., Todd, M. C., Kongola, L., Maurice, L., Nahozya, E., Sanga, H., & MacDonald,  
561 A. M. : Evidence of the dependence of groundwater resources on extreme rainfall in East  
562 Africa, *Nature Climate Change*, 3(4), 374, 2013.  
563

564 Vicente-Serrano, S. M., Beguería, S., & López-Moreno, J. I. : A multiscalar drought index  
565 sensitive to global warming: the standardized precipitation evapotranspiration index, *Journal*  
566 *of climate*, 23(7), 1696-1718, 2010.  
567

568 Watkins, M. M., Wiese, D. N., Yuan, D. N., Boening, C., & Landerer, F. W. : Improved  
569 methods for observing Earth's time variable mass distribution with GRACE using spherical  
570 cap mascons, *Journal of Geophysical Research: Solid Earth*, 120(4), 2648-2671,2015.  
571

572 Wiese, D. N., Yuan, D-N., Boening, C., Landerer, F. W., and Watkins, M. M.: JPL GRACE  
573 Mascon Ocean, Ice, and Hydrology Equivalent Water Height JPL RL05M.1. Ver. 1  
574 PO.DAAC CA USA,2015.  
575

576 Wiese, D. N., Landerer, F. W., and Watkins, M. M.: Quantifying and reducing leakage errors  
577 in the JPL RL05M GRACE mascon solution, *Water Resour. Res.* 52 7490-7502,2016.
